# Supplementary material for: Carbon layer-confined MoS2/Ni3S2 heterostructure with enhanced sodium and potassium storage performance
Source: Royal Society of Chemistry journal article supplement (doi:10.1039/d3ta01792c), 2023-01-01
Supplement: d3ta01792c1.pdf [file d3ta01792c1.pdf]

## **Carbon layer-confined MoS<sub>2</sub>/Ni<sub>3</sub>S<sub>2</sub> heterostructure with enhanced sodium and potassium storage performance**

Jin Bai,<sup>‡a</sup> Jianguo Si,<sup>‡d</sup> Yunjie Mao,<sup>ab</sup> Hongyang Ma,<sup>ab</sup> Peiyao Wang,<sup>ab</sup> Wanyun Li,<sup>ab</sup> Ke Xiao,<sup>ab</sup> Guofeng Zhang,<sup>a</sup> Yiyong Wei,<sup>e</sup> Xuebin Zhu,<sup>\*a</sup> Bangchuan Zhao<sup>\*a</sup> and Yuping Sun<sup>ac</sup>

<sup>a</sup>Key Laboratory of Materials Physics, Institute of Solid State Physics, HFIPS, Chinese Academy of Sciences, Hefei 230031, People's Republic of China

<sup>b</sup>University of Science and Technology of China, Hefei 230026, People's Republic of China

<sup>c</sup>High Magnetic Field Laboratory, Chinese Academy of Sciences, Hefei 230031, People's Republic of China

<sup>d</sup>Spallation Neutron Source Science Center, Institute of High Energy Physics, Chinese Academy of Sciences, Dongguan 523803, People's Republic of China

Prof. Y. Wei

<sup>e</sup>School of Physics and Materials Engineering, Hefei Normal University, Anhui Hefei, 230601, China

Corresponding Authors E-mail: [xbzhu@issp.ac.cn](mailto:xbzhu@issp.ac.cn); [bchzhao@issp.ac.cn](mailto:bchzhao@issp.ac.cn)

<sup>‡</sup> These authors contributed equally to this work.

## Experimental section

*Materials synthesis:* Firstly, the NiMoO<sub>4</sub> precursor material was synthesized by a simple one-pot hydrothermal process. In detail, 0.25 g glucose was uniformly dispersed in 60 ml DI water under continuous stirring for 0.5 h. Then, 0.8724 g Ni(NO<sub>3</sub>)<sub>2</sub>·6H<sub>2</sub>O, 0.5297 g (NH<sub>4</sub>)<sub>6</sub>Mo<sub>7</sub>O<sub>24</sub>·4H<sub>2</sub>O and 1.4019 g hexamethylenetetramine were dissolved in the above solution and stirred for 1h. Next, the mixed solution was transferred to a 100 ml Teflon-lined stainless steel autoclave and kept temperature at 200 °C for 24 h. After cooling to room temperature, the brown sediment was washed several times by centrifugation using DI water and ethanol, and dried under a vacuum at 60 °C for 12 h. Secondly, the sulfur powder and the obtained NiMoO<sub>4</sub> precursor were put at the upstream and downstream of the tube furnace, respectively, and annealed at 500 °C for 2 h under H<sub>2</sub>/Ar atmosphere to obtain the final MoS<sub>2</sub>/Ni<sub>3</sub>S<sub>2</sub>@C material. For comparison, Ni<sub>3</sub>S<sub>2</sub>/C, MoS<sub>2</sub>/C and MoS<sub>2</sub>/Ni<sub>3</sub>S<sub>2</sub> materials were also synthesized via the similar process just without Mo or Ni sources or glucose additives.

*Materials characterizations:* The phase purity and structure of the obtained materials were verified by X-ray diffraction (XRD) with Cu K $\alpha$  radiation. The morphology and microstructure were probed by the scanning electron microscopy (SEM, SU 8020, HITACHI), transmission electron microscopy (TEM, Tecnai G2F20), and high-resolution transmission electron microscopy (HRTEM). The elemental mapping measurement was carried out in the energy-dispersive X-ray spectroscope (EDS) attached to TEM. Raman spectroscopy measurements were performed on a Horiba Jobin Yvon T6400 with a 514.5 nm laser excitation. X-ray photoelectron spectroscopy (XPS) was collected by a Thermo Scientific ESCALAB 250 with Al K $\alpha$  as the excitation source. The specific surface area and pore size distribution were provided by N<sub>2</sub> adsorption and desorption test (Autosorb-iQ-Cx) at 77 K using the Bruauer-Emmett-Teller (BET) and Barret-Joyner-Halenda (BJH) methods. Thermogravimetric analysis (TGA) was implemented by the Pyris 1 Thermogravimetric Analyzer. The electrical conductivity measurements were carried out on a commercial Physical Property Measurement System (PPMS, 1.8 K $\leq$ T $\leq$ 400 K, 0 T $\leq$ H $\leq$ 9 T) using the four-probe

method.

*Electrochemical measurements:* Electrochemical performance was evaluated using CR2032 coin-type cells, which were assembled in an argon-filled glove box with moisture and oxygen less than 0.1 ppm. The working electrode was prepared by mixing the as-prepared materials, Super P, and sodium carboxymethyl cellulose (CMC) in a weight ratio of 7:2:1 into a certain amount of DI water. The uniformly mixed slurry was pasted onto Cu foil and then dried in a vacuum oven at 80 °C overnight. The loading mass of the working electrodes is about 1-2 mg/cm<sup>2</sup>. For SIBs, Na foil was employed as the counter electrode, glass microfiber filters as the separator, and 1 M NaClO<sub>4</sub> dissolved in PC (propylene carbonate) and EC in a volume ratio of 1:1 with 5% FEC (fluoroethylene carbonate) as the electrolyte. For PIBs, K foil was served as the counter electrode, glass microfiber filters as the separator, and 3 M KFSI in DME (1, 2-Dimethoxyethane) as the electrolyte. Galvanostatic charge and discharge (GCD) measurements were carried out on a LAND battery test system in a voltage window of 0.01-3.0 V. Cyclic voltammetry (CV) measurements from 0.01 to 3.0 V at different scan rates and electrochemical impedance spectra (EIS) at the frequency range of 10<sup>5</sup>-0.01 Hz were performed using a CHI 660E electrochemical workstation.

*DFT Calculation:* The density functional theory (DFT) calculations were performed by the Vienna Ab-initio Simulation Package (VASP).<sup>[1]</sup> According to the generalized gradient approximation (GGA), the projector-augmented wave (PAW) pseudopotential with Perdew-Burke-Ernzerhof (PBE) parametrization were used.<sup>[2]</sup> The cut-off energy for the wave function is set as 450 eV, and the Brillouin zone was sampled via a  $\Gamma$ -centered  $k$ -mesh scheme with a  $0.02 \times 2\pi \text{ \AA}^{-1}$  space. The energy and force were converged to  $1.0 \times 10^{-5}$  eV/atom and 0.02 eV/Å, respectively. A 20 Å vacuum layer thickness was applied to avoid virtual interaction. The adsorption energy of Na on MoS<sub>2</sub> or MoS<sub>2</sub>/Ni<sub>3</sub>S<sub>2</sub> heterostructure was calculated by  $E_{\text{ads}} = E_{\text{total}} - E_{\text{Na}} - E_{\text{host}}$ , where the  $E_{\text{total}}$  is the total energy of Na-absorbed MoS<sub>2</sub> or MoS<sub>2</sub>/Ni<sub>3</sub>S<sub>2</sub> heterostructure,  $E_{\text{Na}}$  is the energy of isolated Na atom and  $E_{\text{host}}$  is the energy of MoS<sub>2</sub> or MoS<sub>2</sub>/Ni<sub>3</sub>S<sub>2</sub> heterostructure framework.

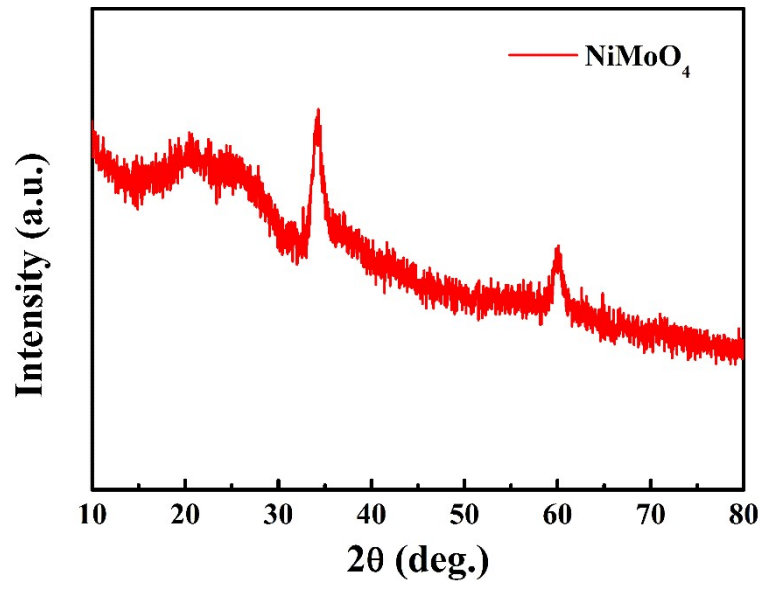

**Fig. S1.** XRD pattern of the NiMoO<sub>4</sub> precursor material.

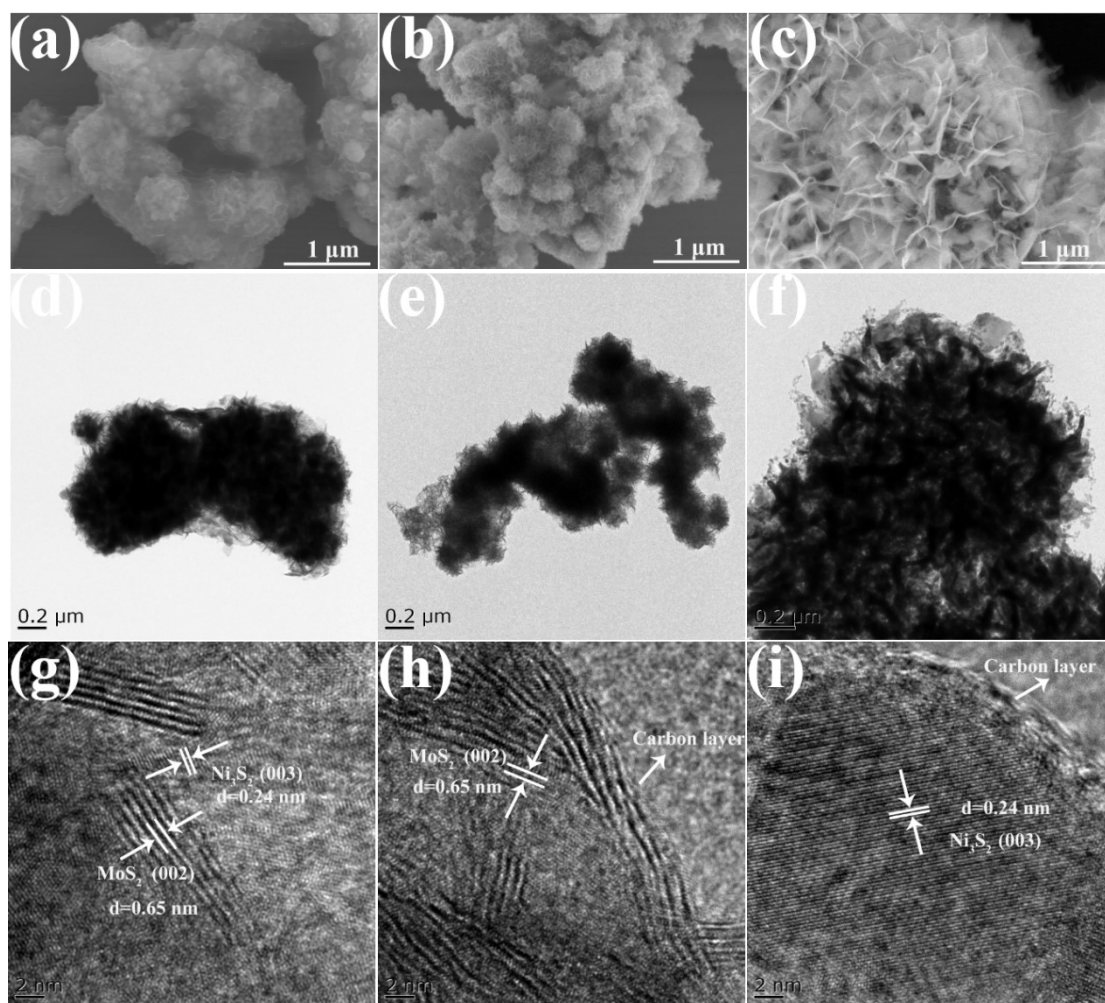

**Fig. S2.** a-c) SEM, d-f) TEM and g-i) HRTEM images of the MoS<sub>2</sub>/Ni<sub>3</sub>S<sub>2</sub>, MoS<sub>2</sub>/C and Ni<sub>3</sub>S<sub>2</sub>/C samples.

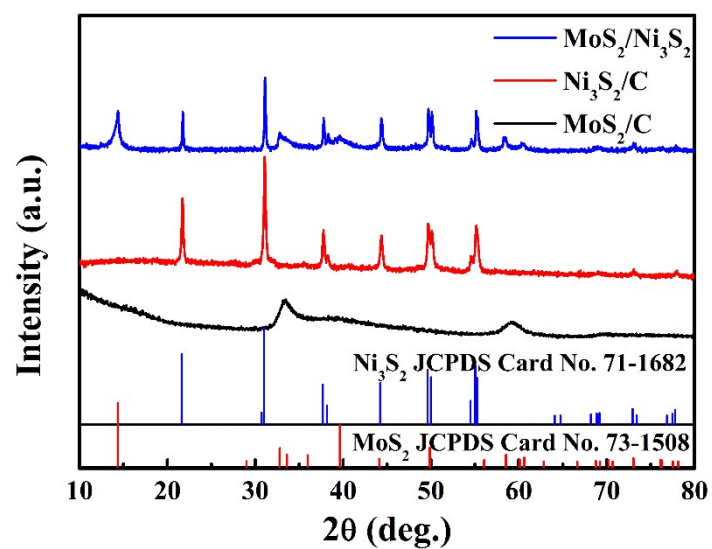

**Fig. S3.** XRD patterns of the MoS<sub>2</sub>/Ni<sub>3</sub>S<sub>2</sub>, MoS<sub>2</sub>/C and Ni<sub>3</sub>S<sub>2</sub>/C samples.

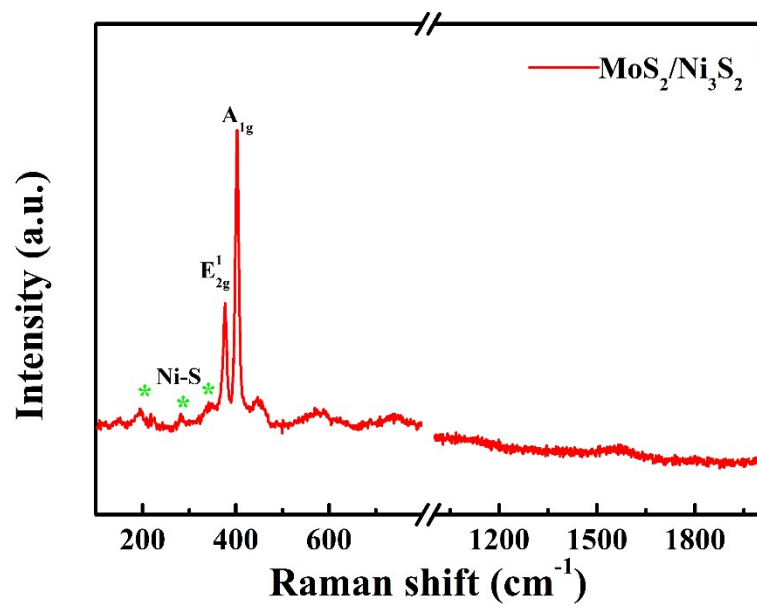

Fig. S4. Raman spectrum of the  $\text{MoS}_2/\text{Ni}_3\text{S}_2$  sample.

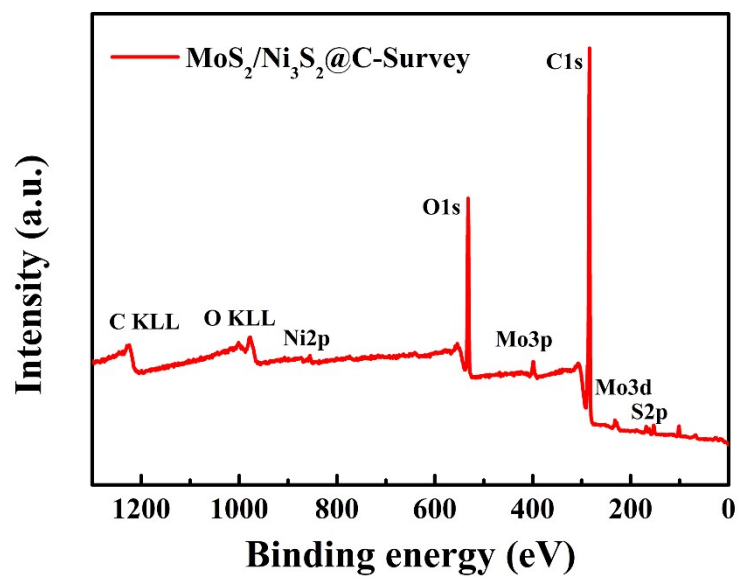

Fig. S5. XPS survey spectrum the  $\text{MoS}_2/\text{Ni}_3\text{S}_2@\text{C}$  material.



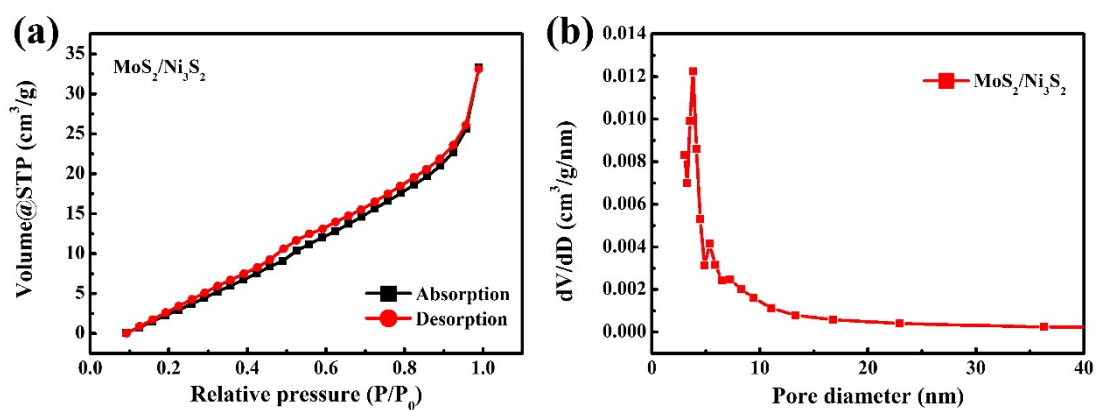

**Fig. S6.** a) Isothermal  $\text{N}_2$  adsorption and desorption curves and b) pore size distribution of the  $\text{MoS}_2/\text{Ni}_3\text{S}_2$  sample.

**Detailed process about TGA calculation of the MoS<sub>2</sub>/Ni<sub>3</sub>S<sub>2</sub>@C sample:** In the temperature range from 50 to 700 °C in air, the main part of the weight loss is composed of three parts: the oxidation of MoS<sub>2</sub>, Ni<sub>3</sub>S<sub>2</sub> and carbon layer. The total weight loss is about 46.5 wt.% in the experimental process. Assumed to the final product is MoO<sub>3</sub> and NiO, the corresponding reaction equations can be written as follows:

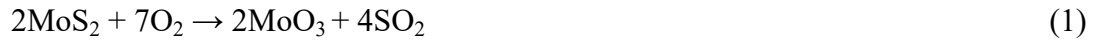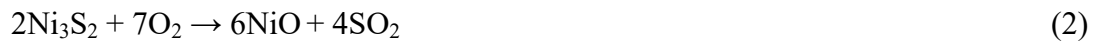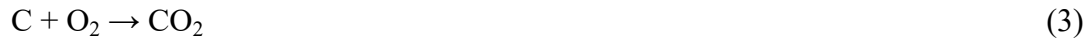

The carbon content of the Ni<sub>3</sub>S<sub>2</sub>/MoS<sub>2</sub>/C heterostructure material was calculated based on the following procedures:

Assumed to molar mass of MoS<sub>2</sub> =  $M_1$ , Ni<sub>3</sub>S<sub>2</sub> =  $M_2$ , MoO<sub>3</sub> =  $M_3$ , NiO =  $M_4$ , the total content of the heterostructure material =  $m_0$ , the content of MoS<sub>2</sub> in the heterostructure =  $m_1$ , Ni<sub>3</sub>S<sub>2</sub> content in the heterostructure =  $m_2$ , MoO<sub>3</sub> content in the heterostructure =  $m_3$ , NiO content in the heterostructure =  $m_4$  and carbon content in the heterostructure =  $m_5$ .

Due to the final product is MoO<sub>3</sub> and NiO, so  $m_3 + m_4 = 0.535m_0$ .

According to Equation (1) and (2),  $m_3$  and  $m_4$  can be deduced from  $m_3 = M_3 \times m_1 / M_1 = 0.90m_1$ , and  $m_4 = M_4 \times 3m_2 / M_2 = 0.90m_2$ , respectively.

Combining the EDS results, the atomic ratio of Ni and Mo is about 2:1, we can calculate that  $m_1/m_2$  is about 1:1. So, we can obtain  $0.9m_1 + 0.90m_2 = 0.535m_0$ ,  $m_1 = m_2 = 0.3m_0$ ,

Thus, carbon content of the heterostructure  $m_5 = m_0 - 0.6m_0 = 0.4m_0$ .

So, the contents of MoS<sub>2</sub>, Ni<sub>3</sub>S<sub>2</sub> and carbon in the heterostructure material are about 30

wt%, 30 wt% and 40 wt%, respectively.

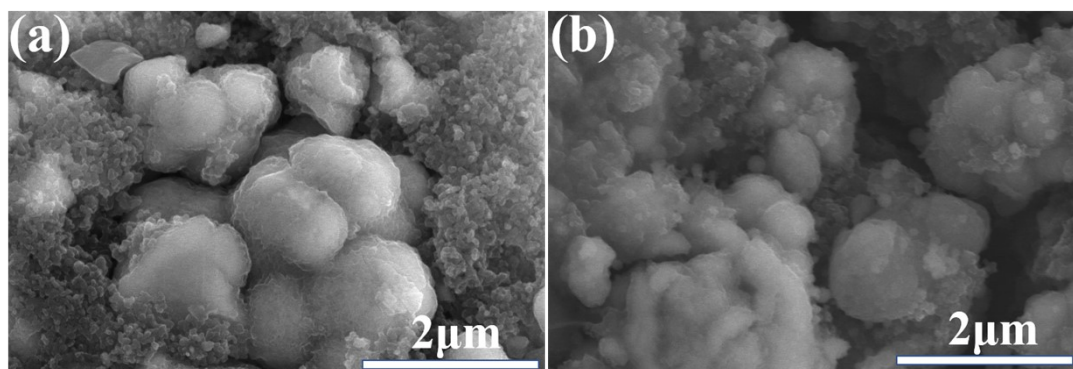

**Fig. S7.** The SEM images of (a) before cycling and (b) after 200 cycles for the  $\text{MoS}_2/\text{Ni}_3\text{S}_2@\text{C}$  electrode for SIBs.

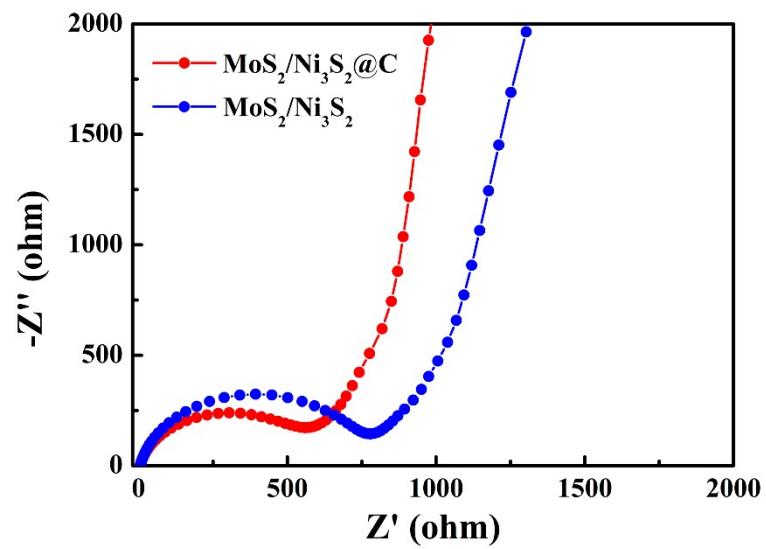

**Fig. S8.** EIS comparison of the for the MoS<sub>2</sub>/Ni<sub>3</sub>S<sub>2</sub>@C and MoS<sub>2</sub>/Ni<sub>3</sub>S<sub>2</sub> electrodes for SIBs.

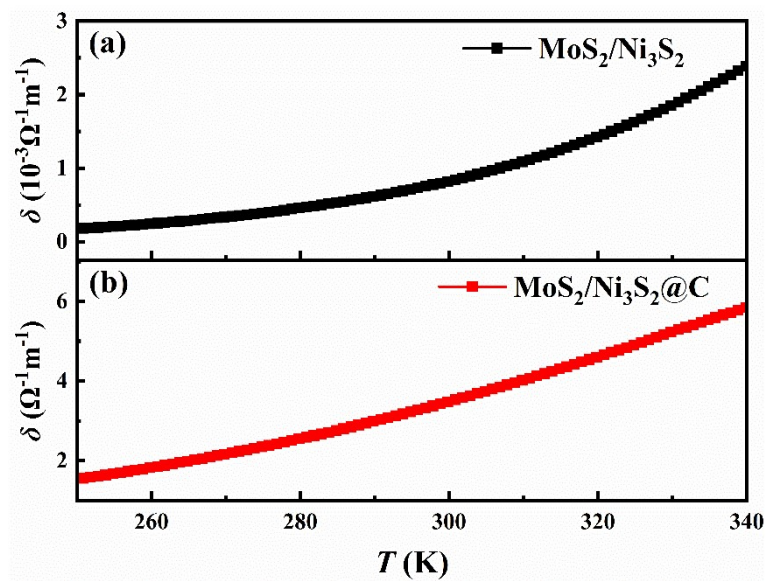

**Fig. S9.** The relationship of temperature dependent electrical conductivity at the range of 250-340 K for (a)  $\text{MoS}_2/\text{Ni}_3\text{S}_2$  and (b)  $\text{MoS}_2/\text{Ni}_3\text{S}_2@\text{C}$  electrodes.

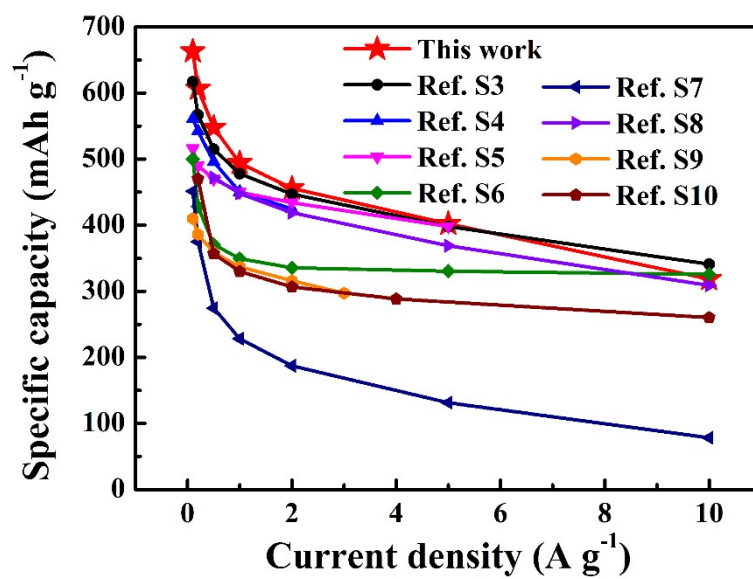

**Fig. S10.** Rate performance comparison of this work with the previously reported MoS<sub>2</sub>-based heterostructure anodes for SIBs.

**Table S1** The detailed comparison of the sodium storage performance this work with the previously reported MoS<sub>2</sub>-based heterostructure anodes for SIBs.

| <b>Electrodes</b>                                    | <b>Cycling performance</b><br>(mAh g <sup>-1</sup> /n/A g <sup>-1</sup> ) | <b>Rate performance</b><br>(mAh g <sup>-1</sup> /A g <sup>-1</sup> ) | <b>Loading mass</b><br>(mg cm <sup>-2</sup> ) | <b>Ref.</b>      |
|------------------------------------------------------|---------------------------------------------------------------------------|----------------------------------------------------------------------|-----------------------------------------------|------------------|
| Bi <sub>2</sub> S <sub>3</sub> /MoS <sub>2</sub>     | 427.7/100/0.5                                                             | 325.5/10                                                             | 1.0-1.2                                       | [6]              |
| MnS-MoS <sub>2</sub>                                 | 214/500/1.0                                                               | 78.3/10                                                              | 1.2                                           | [7]              |
| NB-NiMoS                                             | 420/200/0.5                                                               | 309/10                                                               | 1.4                                           | [8]              |
| Cu <sub>2</sub> S@carbon@MoS <sub>2</sub>            | 300/200/0.3                                                               | 297/3                                                                | 1.0                                           | [9]              |
| MoS <sub>2</sub> -NiS                                | 391/700/2.0                                                               | 342/10                                                               | 1.5                                           | [3]              |
| G/NiS <sub>2</sub> -MoS <sub>2</sub>                 | 509.6/500/0.5                                                             | 424.5/2                                                              | 1.0                                           | [4]              |
| Cu <sub>2</sub> S/MoS <sub>2</sub> ⊂Carbon           | 336.2/300/1.0                                                             | 260.2/10                                                             | 1.0                                           | [10]             |
| NiS/MoS <sub>2</sub> /C                              | 335/190/1.0                                                               | 398/5                                                                | 1.0-2.0                                       | [5]              |
| <b>MoS<sub>2</sub>/Ni<sub>3</sub>S<sub>2</sub>@C</b> | <b>400/200/1.0</b>                                                        | <b>318.5/10</b>                                                      | <b>1.0-2.0</b>                                | <b>This work</b> |

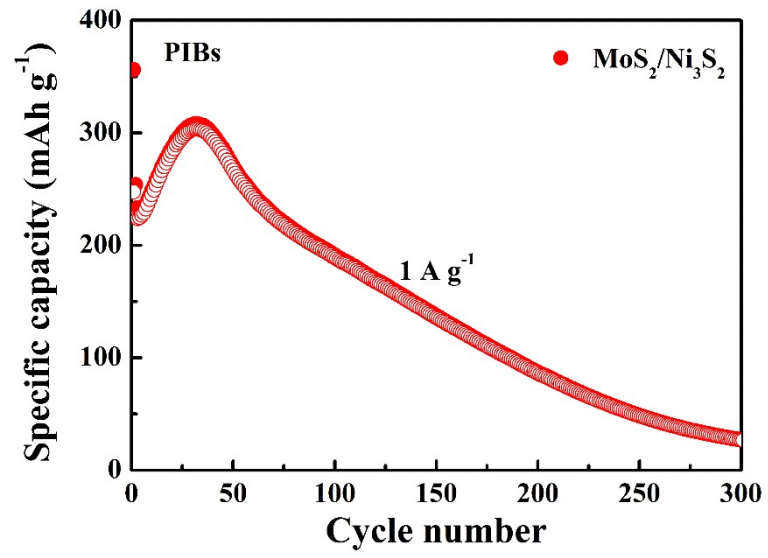

**Fig. S11.** The cycling performance of the MoS<sub>2</sub>/Ni<sub>3</sub>S<sub>2</sub> electrode for PIBs at 1 A g<sup>-1</sup>.



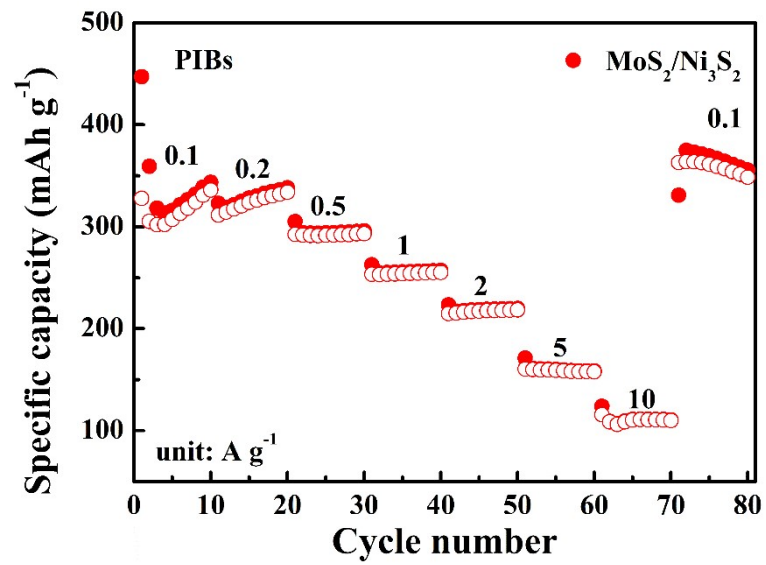

Fig. S12. The rate performance of the MoS<sub>2</sub>/Ni<sub>3</sub>S<sub>2</sub> electrode for PIBs.

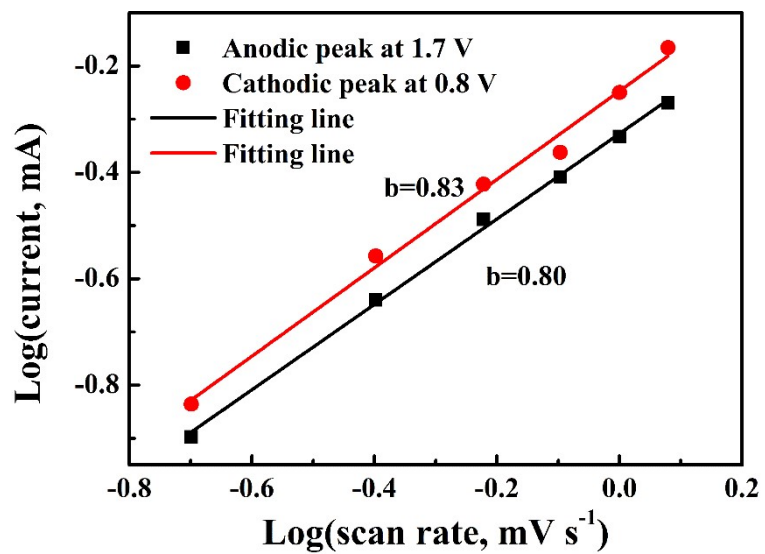

**Fig. S13.** The fitted  $b$  values at the different redox peaks for the  $\text{MoS}_2/\text{Ni}_3\text{S}_2@\text{C}$  heterostructure electrode in SIBs.

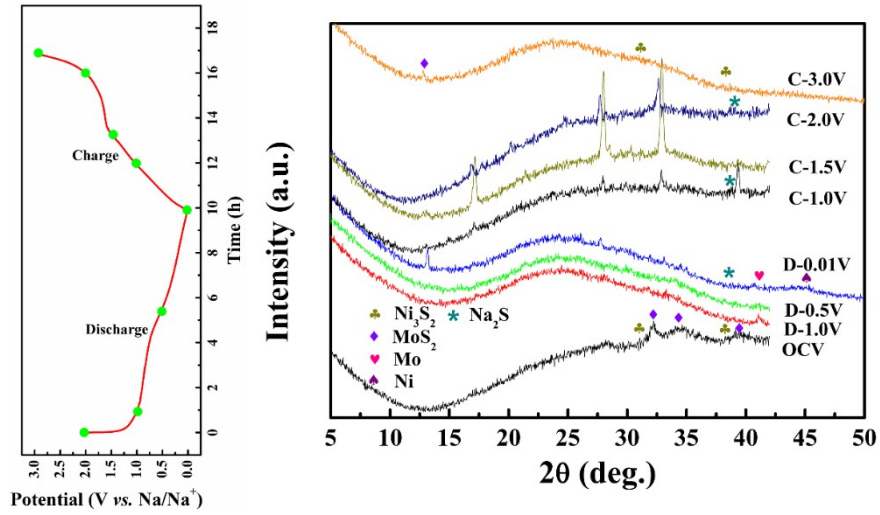

**Fig. S14.** *Ex-situ* XRD patterns of the MoS<sub>2</sub>/Ni<sub>3</sub>S<sub>2</sub>@C heterostructure electrode for SIBs at the different discharge/charge states.

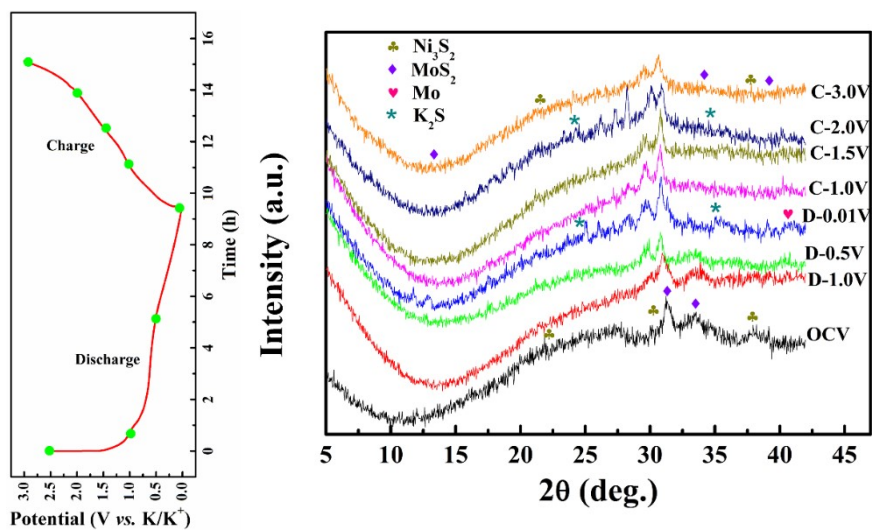

**Fig. S15.** *Ex-situ* XRD patterns of the MoS<sub>2</sub>/Ni<sub>3</sub>S<sub>2</sub>@C heterostructure electrode for PIBs at the different discharge/charge states.

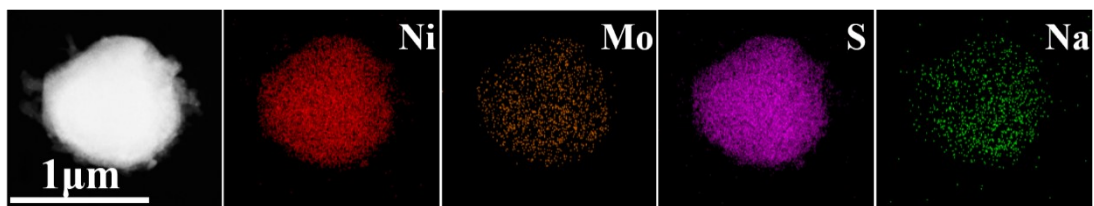

**Fig. S16.** EDS-mapping images of the  $\text{MoS}_2/\text{Ni}_3\text{S}_2@\text{C}$  electrode heterostructure electrode for SIBs at the full de-sodiation state.

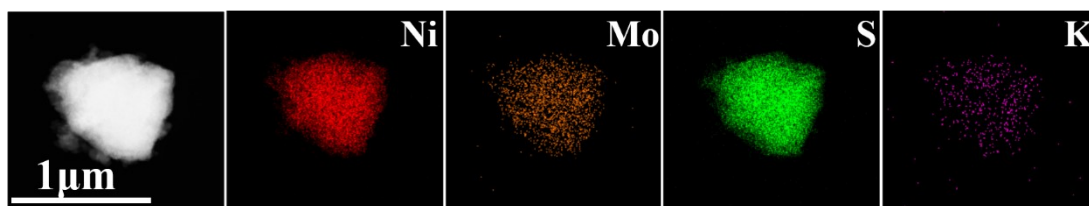

**Fig. S17.** EDS-mapping images of the  $\text{MoS}_2/\text{Ni}_3\text{S}_2@\text{C}$  electrode heterostructure electrode for PIBs at the full de-potassiation state.

## References

- [1] Kresse, G.; Furthmüller, J., Efficiency of ab-initio total energy calculations for metals and semiconductors using a plane-wave basis set. *Compos. Mater. Sci.* **1996**, *6*, 15-50.
- [2] Perdew, J.P.; Burke, K.; Ernzerhof, M., Generalized Gradient Approximation Made Simple. *Phys. Rev. Lett.* **1996**, *77*, 3865-3868.
- [3] Yang, F.; Wang, S.; Guan, J.; Shao, L.; Shi, X.; Cai, J.; Sun, Z., Hierarchical  $\text{MoS}_2$ - $\text{NiS}$  nanosheet-based nanotubes@N-doped carbon coupled with ether-based electrolytes towards high-performance Na-ion batteries. *J. Mater. Chem. A* **2021**, *9*, 27072-27083.
- [4] Huang, J.; Yao, Y.; Huang, M.; Zhang, Y.; Xie, Y.; Li, M.; Yang, L.; Wei, X.; Li, Z., Creating Unidirectional Fast Ion Diffusion Channels in  $\text{G}/\text{NiS}_2$ - $\text{MoS}_2$  Heterostructures for High-Performance Sodium-Ion Batteries. *Small* **2022**, *18*,

2200782.

- [5] Xie, H.; Chen, M.; Wu, L., Hierarchical Nanostructured NiS/MoS<sub>2</sub>/C Composite Hollow Spheres for High Performance Sodium-Ion Storage Performance. *ACS Appl. Mater. Interfaces* **2019**, *11*, 41222-41228.
- [6]. Cao, L.; Liang, X.; Ou, X.; Yang, X.; Li, Y.; Yang, C.; Lin, Z.; Liu, M., Heterointerface Engineering of Hierarchical Bi<sub>2</sub>S<sub>3</sub>/MoS<sub>2</sub> with Self-Generated Rich Phase Boundaries for Superior Sodium Storage Performance. *Adv. Funct. Mater.* **2020**, *30*, 1910732.
- [7] Chen, F.; Shi, D.; Yang, M.; Jiang, H.; Shao, Y.; Wang, S.; Zhang, B.; Shen, J.; Wu, Y.; Hao, X., Novel Designed MnS-MoS<sub>2</sub> Heterostructure for Fast and Stable Li/Na Storage: Insights into the Advanced Mechanism Attributed to Phase Engineering. *Adv. Funct. Mater.* **2020**, *31*, 2007132.
- [8] Choi, J. H.; Park, S.-K.; Kang, Y. C., N-Doped Carbon Coated Ni-Mo Sulfide Tubular Structure Decorated with Nanobubbles for Enhanced Sodium Storage Performance. *Chem. Eng. J.* **2020**, *383*, 123112.
- [9] Fang, Y.; Luan, D.; Chen, Y.; Gao, S.; Lou, X. W. D., Rationally Designed Three-Layered Cu<sub>2</sub>S@Carbon@MoS<sub>2</sub> Hierarchical Nanoboxes for Efficient Sodium Storage. *Angew. Chem., Int. Ed.* **2020**, *59*, 7178-7183.
- [10] Shi, N.; Xi, B.; Huang, M.; Ma, X.; Li, H.; Feng, J.; Xiong, S., Hierarchical Octahedra Constructed by Cu<sub>2</sub>S/MoS<sub>2</sub>@Carbon Framework with Enhanced Sodium Storage. *Small* **2020**, *16*, 2000952.
